# Supplementary material
Source: Springer Nature journal article supplement (https://www.springermedizin.de/resource/supplementary/13031_2012_102_MOESM1_ESM.pdf/9645156)

MOUL

MAMALI

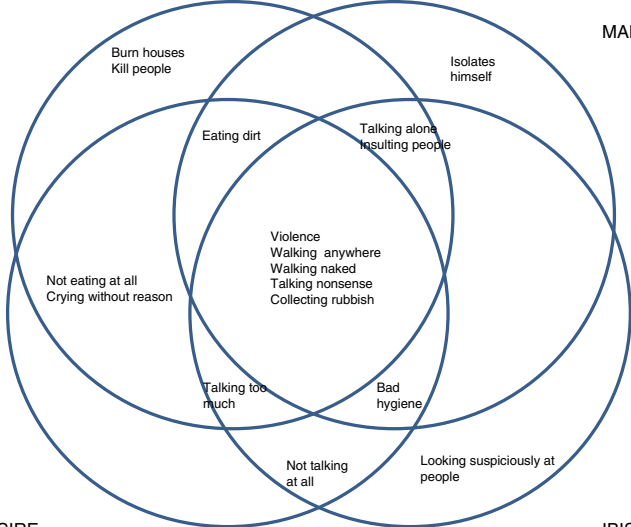

ERISIRE

IBISAZI

Supplement: MOESM1 [file 9645156]
